# Supplementary material for: An ab initio study on the stability of isolated phosphaalkene synthons
Source: Royal Society of Chemistry journal article supplement (doi:10.1039/d3cp03770c), 2023-01-01
Supplement: d3cp03770c1.pdf [file d3cp03770c1.pdf]

## Supplementary Material

### **An ab initio study on the stability of isolated phosphalkene synthons**

Adrianna Cyraniak<sup>1</sup>, Sylwia Freza<sup>1</sup>, Piotr Skurski<sup>1,2,\*</sup>

<sup>1</sup> *Laboratory of Quantum Chemistry, Faculty of Chemistry, University of Gdańsk,  
Wita Stwosza 63, 80-308 Gdańsk, Poland*

<sup>2</sup> *QSAR Lab Ltd., Trzy Lipy 3, 80-172, Poland*

---

\* corresponding author: piotr.skurski@ug.edu.pl

**Table S1.** Cartesian coordinates in Å (calculated at the MP2/aug-cc-pVDZ theory level) of the isomeric structures of studied anions and their energies calculated at the MP2/aug-cc-pVDZ level. The refined MP2/aug-cc-pVTZ electronic energies are also provided.

|                                                                       |              |              |              |
|-----------------------------------------------------------------------|--------------|--------------|--------------|
| <b>(P=CH<sub>2</sub>)<sup>-</sup> (C<sub>2v</sub>)</b>                |              |              |              |
| 1                                                                     | 0.000000000  | 0.923003000  | -1.678561000 |
| 6                                                                     | 0.000000000  | 0.000000000  | -1.066166000 |
| 15                                                                    | 0.000000000  | 0.000000000  | 0.650274000  |
| 1                                                                     | 0.000000000  | -0.923003000 | -1.678561000 |
| MP2/aug-cc-pVDZ=-379.9929903 a.u. MP2/aug-cc-pVTZ=-380.0672188 a.u.   |              |              |              |
| <b>(HP=CH)<sup>-</sup> (C<sub>s</sub>)</b>                            |              |              |              |
| 1                                                                     | 1.412074000  | 0.805690000  | 0.000000000  |
| 15                                                                    | -0.014316000 | 0.519968000  | 0.000000000  |
| 6                                                                     | -0.014316000 | -1.193063000 | 0.000000000  |
| 1                                                                     | -1.111446000 | -1.446832000 | 0.000000000  |
| MP2/aug-cc-pVDZ=-379.9584869 a.u. MP2/aug-cc-pVTZ=-380.0336653 a.u.   |              |              |              |
| <b>(H<sub>2</sub>P=C)<sup>-</sup> (C<sub>2v</sub>)</b>                |              |              |              |
| 1                                                                     | 0.000000000  | 1.086106000  | 1.335113000  |
| 15                                                                    | 0.000000000  | 0.000000000  | 0.344417000  |
| 6                                                                     | 0.000000000  | 0.000000000  | -1.306081000 |
| 1                                                                     | 0.000000000  | -1.086106000 | 1.335113000  |
| MP2//aug-cc-pVDZ=-379.8731455 a.u. MP2/aug-cc-pVTZ=-379.9503571 a.u.  |              |              |              |
| <b>(P=C(CH<sub>3</sub>)<sub>2</sub>)<sup>-</sup> (C<sub>2v</sub>)</b> |              |              |              |
| 6                                                                     | 0.000000000  | 1.259028000  | -1.091956000 |
| 6                                                                     | 0.000000000  | -1.259028000 | -1.091956000 |
| 1                                                                     | 0.000000000  | -2.161842000 | -0.464402000 |
| 1                                                                     | -0.889841000 | -1.283717000 | -1.757826000 |
| 1                                                                     | 0.889841000  | -1.283717000 | -1.757826000 |
| 1                                                                     | -0.889841000 | 1.283717000  | -1.757826000 |
| 1                                                                     | 0.000000000  | 2.161842000  | -0.464402000 |
| 1                                                                     | 0.889841000  | 1.283717000  | -1.757826000 |
| 6                                                                     | 0.000000000  | 0.000000000  | -0.224746000 |
| 15                                                                    | 0.000000000  | 0.000000000  | 1.494137000  |

MP2/aug-cc-pVDZ=-458.3793188 a.u. MP2/aug-cc-pVTZ=-458.5283556 a.u.

**(P=CH-C<sub>2</sub>H<sub>5</sub>)<sup>-</sup> (C<sub>s</sub>)**

|    |              |              |              |
|----|--------------|--------------|--------------|
| 15 | -1.576873000 | 0.233856000  | 0.000000000  |
| 6  | 0.000000000  | 0.911396000  | 0.000000000  |
| 1  | 0.146026000  | 2.013971000  | 0.000000000  |
| 6  | 1.352980000  | 0.191209000  | 0.000000000  |
| 1  | 1.935123000  | 0.532379000  | 0.882802000  |
| 1  | 1.935123000  | 0.532379000  | -0.882802000 |
| 6  | 1.289757000  | -1.338168000 | 0.000000000  |
| 1  | 2.307479000  | -1.772323000 | 0.000000000  |
| 1  | 0.736458000  | -1.700437000 | 0.880533000  |
| 1  | 0.736458000  | -1.700437000 | -0.880533000 |

MP2/aug-cc-pVDZ=-458.3737718 a.u. MP2/aug-cc-pVTZ=-458.5226957 a.u.

**(H<sub>3</sub>C-P=C-CH<sub>3</sub>)<sup>-</sup> (C<sub>s</sub>)**

|    |              |              |              |
|----|--------------|--------------|--------------|
| 6  | -1.886666000 | 0.875745000  | 0.000000000  |
| 6  | 1.719257000  | -1.377068000 | 0.000000000  |
| 1  | 2.473719000  | -0.548899000 | 0.000000000  |
| 1  | 1.930869000  | -2.014823000 | 0.880376000  |
| 1  | 1.930869000  | -2.014823000 | -0.880376000 |
| 1  | -2.312177000 | -0.142668000 | 0.000000000  |
| 1  | -2.232421000 | 1.427952000  | 0.893029000  |
| 1  | -2.232421000 | 1.427952000  | -0.893029000 |
| 6  | 0.241003000  | -0.966456000 | 0.000000000  |
| 15 | 0.000000000  | 0.711465000  | 0.000000000  |

MP2/aug-cc-pVDZ=-458.3407306 a.u. MP2/aug-cc-pVTZ=-458.4934878 a.u.

**(P=C(C<sub>6</sub>H<sub>5</sub>)<sub>2</sub>)<sup>-</sup> (C<sub>2</sub>)**

|    |              |              |              |
|----|--------------|--------------|--------------|
| 6  | 0.000000000  | 0.000000000  | 1.031724000  |
| 15 | 0.000000000  | 0.000000000  | 2.767920000  |
| 6  | 0.000000000  | 1.253008000  | 0.214743000  |
| 6  | -0.766804000 | 1.347789000  | -0.976997000 |
| 6  | 0.728049000  | 2.399738000  | 0.618390000  |
| 6  | -0.823171000 | 2.542397000  | -1.719884000 |
| 6  | 0.689194000  | 3.589216000  | -0.129889000 |
| 6  | -0.089459000 | 3.671599000  | -1.304048000 |
| 1  | -1.337439000 | 0.473724000  | -1.309606000 |
| 1  | 1.299715000  | 2.327506000  | 1.549616000  |
| 1  | -1.440269000 | 2.592941000  | -2.624497000 |
| 1  | 1.270083000  | 4.457840000  | 0.201434000  |
| 1  | -0.122755000 | 4.599588000  | -1.885395000 |
| 6  | 0.000000000  | -1.253008000 | 0.214743000  |
| 6  | -0.728049000 | -2.399738000 | 0.618390000  |
| 6  | 0.766804000  | -1.347789000 | -0.976997000 |
| 6  | -0.689194000 | -3.589216000 | -0.129889000 |
| 6  | 0.823171000  | -2.542397000 | -1.719884000 |
| 6  | 0.089459000  | -3.671599000 | -1.304048000 |
| 1  | -1.299715000 | -2.327506000 | 1.549616000  |
| 1  | 1.337439000  | -0.473724000 | -1.309606000 |
| 1  | -1.270083000 | -4.457840000 | 0.201434000  |
| 1  | 1.440269000  | -2.592941000 | -2.624497000 |
| 1  | 0.122755000  | -4.599588000 | -1.885395000 |

MP2/aug-cc-pVDZ=-840.7778612 a.u. MP2/aug-cc-pVTZ=-841.2371824 a.u.

**(P=CH-C<sub>6</sub>H<sub>4</sub>-C<sub>6</sub>H<sub>5</sub>)<sup>-</sup> (C<sub>1</sub>)**

|    |              |              |              |
|----|--------------|--------------|--------------|
| 15 | -5.067953000 | -0.636237000 | 0.184862000  |
| 6  | -3.854606000 | 0.548103000  | -0.145180000 |
| 1  | -4.135282000 | 1.582024000  | -0.434021000 |
| 6  | -2.384040000 | 0.389200000  | -0.101658000 |
| 6  | -1.756280000 | -0.836551000 | 0.246329000  |
| 6  | -1.527155000 | 1.479921000  | -0.412632000 |
| 1  | -2.419659000 | -1.673350000 | 0.498218000  |
| 1  | -1.982835000 | 2.436630000  | -0.697898000 |
| 6  | -0.361791000 | -0.963099000 | 0.278655000  |
| 6  | -0.127721000 | 1.362665000  | -0.380710000 |
| 1  | 0.087429000  | -1.916226000 | 0.583340000  |
| 1  | 0.498362000  | 2.218451000  | -0.660573000 |
| 6  | 0.484457000  | 0.133816000  | -0.033581000 |
| 6  | 1.956096000  | -0.002578000 | -0.001164000 |
| 6  | 2.588280000  | -1.198825000 | -0.423892000 |
| 6  | 2.780476000  | 1.057184000  | 0.453290000  |
| 1  | 1.970705000  | -2.019255000 | -0.803069000 |
| 1  | 2.309912000  | 1.977908000  | 0.813018000  |
| 6  | 3.987843000  | -1.332440000 | -0.390105000 |
| 6  | 4.180920000  | 0.930778000  | 0.476392000  |
| 1  | 4.452137000  | -2.265527000 | -0.726601000 |
| 1  | 4.795361000  | 1.762694000  | 0.836847000  |
| 6  | 4.793509000  | -0.266742000 | 0.057231000  |
| 1  | 5.883237000  | -0.368392000 | 0.079955000  |

MP2/aug-cc-pVDZ=-840.7733724 a.u. MP2/aug-cc-pVTZ=-841.2340070 a.u.

**(C<sub>6</sub>H<sub>5</sub>-P=C-C<sub>6</sub>H<sub>5</sub>)<sup>-</sup> (C<sub>s</sub>)**

|    |              |              |              |
|----|--------------|--------------|--------------|
| 6  | 0.378712000  | 0.582259000  | 0.000000000  |
| 15 | -1.041582000 | -0.319269000 | 0.000000000  |
| 6  | -0.428851000 | -2.088070000 | 0.000000000  |
| 6  | 0.944741000  | -2.425946000 | 0.000000000  |
| 6  | -1.375325000 | -3.139125000 | 0.000000000  |
| 6  | 1.357133000  | -3.770437000 | 0.000000000  |
| 6  | -0.970530000 | -4.490109000 | 0.000000000  |
| 6  | 0.401196000  | -4.810065000 | 0.000000000  |
| 1  | 1.663871000  | -1.596802000 | 0.000000000  |
| 1  | -2.444536000 | -2.890671000 | 0.000000000  |
| 1  | 2.426051000  | -4.014833000 | 0.000000000  |
| 1  | -1.720230000 | -5.290037000 | 0.000000000  |
| 1  | 0.723123000  | -5.857484000 | 0.000000000  |
| 6  | 0.308763000  | 2.024389000  | 0.000000000  |
| 6  | 0.320981000  | 2.785379000  | 1.214293000  |
| 6  | 0.320981000  | 2.785379000  | -1.214293000 |
| 6  | 0.320981000  | 4.190184000  | 1.211719000  |
| 6  | 0.320981000  | 4.190184000  | -1.211719000 |
| 6  | 0.325707000  | 4.915156000  | 0.000000000  |
| 1  | 0.327120000  | 2.239817000  | 2.164939000  |
| 1  | 0.327120000  | 2.239817000  | -2.164939000 |
| 1  | 0.318188000  | 4.726997000  | 2.168699000  |
| 1  | 0.318188000  | 4.726997000  | -2.168699000 |
| 1  | 0.332014000  | 6.010152000  | 0.000000000  |

MP2/aug-cc-pVDZ=-840.7479704 a.u. MP2/aug-cc-pVTZ=-841.2123409 a.u.

**(P=CF-C<sub>6</sub>F<sub>4</sub>-C<sub>6</sub>F<sub>5</sub>)<sup>-</sup> (C<sub>1</sub>)**

|    |              |              |              |
|----|--------------|--------------|--------------|
| 15 | -5.332088000 | -0.665410000 | -1.079045000 |
| 6  | -4.404629000 | 0.067047000  | 0.087756000  |
| 9  | -4.856444000 | 0.807157000  | 1.266557000  |
| 6  | -2.925637000 | 0.087906000  | 0.124001000  |
| 6  | -2.181430000 | -0.917195000 | 0.781623000  |
| 6  | -2.177114000 | 1.099023000  | -0.519487000 |
| 9  | -2.823878000 | -1.892818000 | 1.465991000  |
| 9  | -2.815041000 | 2.116316000  | -1.144408000 |
| 6  | -0.788738000 | -0.950002000 | 0.736458000  |
| 6  | -0.784148000 | 1.067420000  | -0.564856000 |
| 9  | -0.113144000 | -1.935774000 | 1.395253000  |
| 9  | -0.107380000 | 2.039335000  | -1.242332000 |
| 6  | -0.051555000 | 0.039811000  | 0.058930000  |
| 6  | 1.420028000  | 0.004057000  | 0.010448000  |
| 6  | 2.110125000  | -1.113379000 | -0.495137000 |
| 6  | 2.196254000  | 1.084346000  | 0.469357000  |
| 9  | 1.423931000  | -2.168231000 | -0.981980000 |
| 9  | 1.596739000  | 2.169606000  | 1.003631000  |
| 6  | 3.507979000  | -1.159973000 | -0.540841000 |
| 6  | 3.594575000  | 1.062568000  | 0.422087000  |
| 9  | 4.148458000  | -2.241742000 | -1.038904000 |
| 9  | 4.318741000  | 2.110396000  | 0.876840000  |
| 6  | 4.252200000  | -0.065859000 | -0.082728000 |
| 9  | 5.602891000  | -0.099074000 | -0.127314000 |

MP2/aug-cc-pVDZ=-1831.3243206 a.u. MP2/aug-cc-pVTZ=-1832.5700686 a.u.

**(P=C(C<sub>6</sub>F<sub>5</sub>)<sub>2</sub>)<sup>-</sup> (C<sub>2</sub>)**

|    |              |              |              |
|----|--------------|--------------|--------------|
| 6  | -1.601125000 | 3.247262000  | -0.934669000 |
| 6  | -0.527987000 | 3.484481000  | -0.066907000 |
| 6  | 0.004368000  | 2.437828000  | 0.696891000  |
| 6  | -0.513776000 | 1.128294000  | 0.631531000  |
| 6  | -1.573452000 | 0.924747000  | -0.274943000 |
| 6  | -2.127561000 | 1.955126000  | -1.042200000 |
| 6  | 0.000000000  | 0.000000000  | 1.463836000  |
| 6  | 0.513776000  | -1.128294000 | 0.631531000  |
| 6  | 1.573452000  | -0.924747000 | -0.274943000 |
| 6  | 2.127561000  | -1.955126000 | -1.042200000 |
| 6  | 1.601125000  | -3.247262000 | -0.934669000 |
| 6  | 0.527987000  | -3.484481000 | -0.066907000 |
| 6  | -0.004368000 | -2.437828000 | 0.696891000  |
| 15 | 0.000000000  | 0.000000000  | 3.177415000  |
| 9  | 2.117566000  | 0.314827000  | -0.401240000 |
| 9  | -1.070317000 | -2.725946000 | 1.471555000  |
| 9  | 3.171311000  | -1.722259000 | -1.881580000 |
| 9  | 0.000000000  | -4.734718000 | 0.005489000  |
| 9  | 2.123590000  | -4.261983000 | -1.669818000 |
| 9  | 1.070317000  | 2.725946000  | 1.471555000  |
| 9  | -2.117566000 | -0.314827000 | -0.401240000 |
| 9  | 0.000000000  | 4.734718000  | 0.005489000  |
| 9  | -3.171311000 | 1.722259000  | -1.881580000 |
| 9  | -2.123590000 | 4.261983000  | -1.669818000 |

MP2/aug-cc-pVDZ=-1831.3132685 a.u. MP2/aug-cc-pVTZ=-1832.5604219 a.u.



**(C<sub>6</sub>F<sub>5</sub>-P=C-C<sub>6</sub>F<sub>5</sub>)<sup>-</sup> (C<sub>1</sub>)**

|    |              |              |              |
|----|--------------|--------------|--------------|
| 6  | 4.852402000  | -0.024826000 | 0.251565000  |
| 6  | 4.157322000  | 1.144598000  | -0.082880000 |
| 6  | 2.763890000  | 1.132045000  | -0.187640000 |
| 6  | 1.970046000  | -0.024764000 | 0.046573000  |
| 6  | 2.724267000  | -1.186987000 | 0.367730000  |
| 6  | 4.117364000  | -1.195968000 | 0.476700000  |
| 6  | 0.524760000  | 0.019092000  | 0.118619000  |
| 15 | -0.352349000 | -0.282630000 | -1.283474000 |
| 6  | -2.096657000 | -0.084971000 | -0.581890000 |
| 6  | -2.578685000 | 1.137939000  | -0.085357000 |
| 6  | -3.870006000 | 1.278190000  | 0.441980000  |
| 6  | -4.726878000 | 0.171929000  | 0.478331000  |
| 6  | -4.288170000 | -1.060357000 | -0.018720000 |
| 6  | -2.994414000 | -1.162226000 | -0.545758000 |
| 9  | -1.816066000 | 2.255741000  | -0.127077000 |
| 9  | -2.617001000 | -2.382354000 | -1.017409000 |
| 9  | -4.312597000 | 2.474421000  | 0.909324000  |
| 9  | -5.121947000 | -2.132706000 | 0.019180000  |
| 9  | -5.978213000 | 0.294925000  | 0.986964000  |
| 9  | 2.147040000  | 2.305552000  | -0.503123000 |
| 9  | 2.067798000  | -2.356183000 | 0.611967000  |
| 9  | 4.856841000  | 2.291584000  | -0.321211000 |
| 9  | 4.777595000  | -2.348700000 | 0.788201000  |
| 9  | 6.213637000  | -0.027027000 | 0.339473000  |

MP2/aug-cc-pVDZ=-1831.2903892 a.u. MP2/aug-cc-pVTZ=-1832.5420041 a.u.

**(P=CMes<sub>2</sub>)<sup>-</sup> (C<sub>2</sub>)**

|    |              |              |              |
|----|--------------|--------------|--------------|
| 6  | -2.317463000 | 0.905582000  | 0.609766000  |
| 6  | -1.254466000 | -0.032048000 | 0.420081000  |
| 6  | -1.388871000 | -0.997638000 | -0.629298000 |
| 6  | -2.538496000 | -1.008839000 | -1.444247000 |
| 6  | -3.578364000 | -0.073336000 | -1.279819000 |
| 6  | -3.439838000 | 0.871095000  | -0.246200000 |
| 6  | 0.000000000  | 0.000000000  | 1.241206000  |
| 6  | 1.254466000  | 0.032048000  | 0.420081000  |
| 6  | 1.388871000  | 0.997638000  | -0.629298000 |
| 6  | 2.538496000  | 1.008839000  | -1.444247000 |
| 6  | 3.578364000  | 0.073336000  | -1.279819000 |
| 6  | 3.439838000  | -0.871095000 | -0.246200000 |
| 6  | 2.317463000  | -0.905582000 | 0.609766000  |
| 15 | 0.000000000  | 0.000000000  | 2.977250000  |
| 6  | 0.335998000  | 2.061290000  | -0.867667000 |
| 1  | 2.621275000  | 1.772731000  | -2.229930000 |
| 6  | 4.806066000  | 0.104912000  | -2.165881000 |
| 1  | 4.231612000  | -1.618269000 | -0.100631000 |
| 6  | 2.290158000  | -1.974608000 | 1.679451000  |
| 6  | -0.335998000 | -2.061290000 | -0.867667000 |
| 1  | -2.621275000 | -1.772731000 | -2.229930000 |
| 6  | -4.806066000 | -0.104912000 | -2.165881000 |
| 1  | -4.231612000 | 1.618269000  | -0.100631000 |
| 6  | -2.290158000 | 1.974608000  | 1.679451000  |
| 1  | 0.766113000  | 2.884891000  | -1.462728000 |
| 1  | -0.541721000 | 1.662896000  | -1.404515000 |
| 1  | -0.024779000 | 2.470974000  | 0.088209000  |
| 1  | -2.983667000 | 2.790823000  | 1.407136000  |
| 1  | -2.577896000 | 1.554088000  | 2.655019000  |
| 1  | -1.276955000 | 2.381981000  | 1.822505000  |
| 1  | -5.421295000 | 0.797245000  | -2.016348000 |
| 1  | -4.529166000 | -0.156863000 | -3.232862000 |
| 1  | -5.438603000 | -0.983042000 | -1.945409000 |
| 1  | -0.766113000 | -2.884891000 | -1.462728000 |
| 1  | 0.541721000  | -1.662896000 | -1.404515000 |
| 1  | 0.024779000  | -2.470974000 | 0.088209000  |
| 1  | 5.421295000  | -0.797245000 | -2.016348000 |
| 1  | 4.529166000  | 0.156863000  | -3.232862000 |
| 1  | 5.438603000  | 0.983042000  | -1.945409000 |
| 1  | 2.983667000  | -2.790823000 | 1.407136000  |
| 1  | 2.577896000  | -1.554088000 | 2.655019000  |
| 1  | 1.276955000  | -2.381981000 | 1.822505000  |

MP2/aug-cc-pVDZ=-1075.9358809 a.u. MP2/aug-cc-pVTZ=-1076.6122979 a.u.

**(P=C(CH<sub>3</sub>)-Mes-Mes)<sup>-</sup> (C<sub>1</sub>)**

|    |              |              |              |
|----|--------------|--------------|--------------|
| 15 | -4.472494000 | 2.061691000  | 1.003409000  |
| 6  | -3.706446000 | 1.058589000  | -0.164326000 |
| 6  | -2.232674000 | 0.813847000  | -0.104434000 |
| 6  | -1.712827000 | -0.293287000 | 0.626094000  |
| 6  | -1.329572000 | 1.664307000  | -0.805053000 |
| 6  | -0.323738000 | -0.529016000 | 0.651470000  |
| 6  | 0.055099000  | 1.406193000  | -0.763316000 |
| 6  | 0.573802000  | 0.308575000  | -0.044123000 |
| 6  | 2.038158000  | 0.045445000  | -0.011435000 |
| 6  | 2.629903000  | -0.791998000 | -0.989452000 |
| 6  | 2.842136000  | 0.633216000  | 0.999750000  |
| 6  | 4.019491000  | -1.031140000 | -0.943501000 |
| 6  | 4.226551000  | 0.372865000  | 1.015704000  |
| 1  | 4.475368000  | -1.679924000 | -1.702317000 |
| 1  | 4.845770000  | 0.828861000  | 1.799285000  |
| 6  | 4.835239000  | -0.457884000 | 0.051454000  |
| 6  | -4.377083000 | 0.336842000  | -1.331940000 |
| 1  | -4.221097000 | -0.760122000 | -1.267966000 |
| 1  | -5.457277000 | 0.550592000  | -1.328703000 |
| 1  | -3.943883000 | 0.656193000  | -2.302557000 |
| 6  | 2.200453000  | 1.526098000  | 2.040246000  |
| 1  | 1.699838000  | 2.384782000  | 1.564258000  |
| 1  | 1.419983000  | 0.981239000  | 2.595706000  |
| 1  | 2.952787000  | 1.899983000  | 2.752927000  |
| 6  | 6.326576000  | -0.720788000 | 0.093927000  |
| 1  | 6.619319000  | -1.202509000 | 1.042306000  |
| 1  | 6.633607000  | -1.382054000 | -0.731609000 |
| 1  | 6.899266000  | 0.218279000  | 0.008601000  |
| 6  | 1.764001000  | -1.414027000 | -2.064472000 |
| 1  | 2.369541000  | -2.031556000 | -2.747024000 |
| 1  | 0.976768000  | -2.042246000 | -1.616601000 |
| 1  | 1.247875000  | -0.634924000 | -2.648932000 |
| 1  | 0.747826000  | 2.069321000  | -1.299230000 |
| 1  | 0.072659000  | -1.379646000 | 1.222546000  |
| 6  | -1.858945000 | 2.883890000  | -1.523151000 |
| 1  | -1.049551000 | 3.400063000  | -2.066179000 |
| 1  | -2.656828000 | 2.618225000  | -2.236053000 |
| 1  | -2.311420000 | 3.572833000  | -0.789827000 |
| 6  | -2.650688000 | -1.160167000 | 1.433692000  |
| 1  | -3.473226000 | -1.552362000 | 0.813178000  |
| 1  | -2.108046000 | -2.006526000 | 1.887179000  |
| 1  | -3.119230000 | -0.552700000 | 2.226530000  |

MP2/aug-cc-pVDZ=-1075.9301052 a.u. MP2/aug-cc-pVTZ=-1076.608498 a.u.

**(Mes-P=C-Mes)<sup>-</sup> (C<sub>1</sub>)**

|    |              |              |              |
|----|--------------|--------------|--------------|
| 6  | 1.027290000  | -3.814097000 | -0.307104000 |
| 6  | 1.955501000  | -3.184953000 | -1.178866000 |
| 6  | 2.318734000  | -3.839893000 | -2.388005000 |
| 6  | 1.759817000  | -5.095784000 | -2.700892000 |
| 6  | 0.842865000  | -5.733221000 | -1.839774000 |
| 6  | 0.485285000  | -5.072095000 | -0.649147000 |
| 6  | 1.665074000  | -0.454709000 | -1.411001000 |
| 6  | 1.894154000  | 0.968432000  | -1.286928000 |
| 6  | 2.593890000  | 1.701444000  | -2.306483000 |
| 6  | 2.673592000  | 3.105026000  | -2.252292000 |
| 6  | 2.079504000  | 3.853522000  | -1.212094000 |
| 6  | 1.384137000  | 3.135051000  | -0.214770000 |
| 6  | 1.282505000  | 1.731731000  | -0.233765000 |
| 15 | 2.739966000  | -1.550417000 | -0.710006000 |
| 6  | 3.202857000  | 0.930048000  | -3.452032000 |
| 1  | 3.212146000  | 3.631951000  | -3.053371000 |
| 6  | 2.221372000  | 5.359627000  | -1.145750000 |
| 1  | 0.897803000  | 3.686027000  | 0.603280000  |
| 6  | 0.498091000  | 0.993114000  | 0.823288000  |
| 6  | 3.269173000  | -3.171850000 | -3.359423000 |
| 1  | 2.043009000  | -5.586967000 | -3.642134000 |
| 6  | 0.258702000  | -7.084526000 | -2.197650000 |
| 1  | -0.237317000 | -5.545176000 | 0.029538000  |
| 6  | 0.583675000  | -3.121057000 | 0.964335000  |
| 1  | 3.624784000  | 1.611598000  | -4.210650000 |
| 1  | 3.996525000  | 0.248762000  | -3.100364000 |
| 1  | 2.430870000  | 0.287632000  | -3.917121000 |
| 1  | -0.095702000 | -3.766921000 | 1.545647000  |
| 1  | 1.450230000  | -2.856404000 | 1.594792000  |
| 1  | 0.069423000  | -2.176129000 | 0.723040000  |
| 1  | -0.443059000 | -7.427595000 | -1.420500000 |
| 1  | -0.289220000 | -7.042137000 | -3.154768000 |
| 1  | 1.049051000  | -7.847946000 | -2.302284000 |
| 1  | 3.481119000  | -3.832649000 | -4.216770000 |
| 1  | 2.835417000  | -2.226885000 | -3.725847000 |
| 1  | 4.221517000  | -2.911160000 | -2.865939000 |
| 1  | 1.372499000  | 5.814627000  | -0.607004000 |
| 1  | 3.146417000  | 5.664455000  | -0.621037000 |
| 1  | 2.256272000  | 5.801989000  | -2.156424000 |
| 1  | 0.001036000  | 1.696339000  | 1.513558000  |
| 1  | -0.260083000 | 0.348644000  | 0.338678000  |
| 1  | 1.147059000  | 0.316888000  | 1.405777000  |

MP2/aug-cc-pVDZ=-1075.9048848 a.u. MP2/aug-cc-pVTZ=-1076.5891742 a.u.

**Table S2.** Reaction energies ( $E_r$  in kcal/mol) of the  $(\text{P}=\text{CH}_2)^-$  fragmentation processes.

| Decomposition path                                                                   | $E_r$ [kcal/mol] |
|--------------------------------------------------------------------------------------|------------------|
| $(\text{P}=\text{CH}_2)^- \rightarrow \text{CH}_2 + \text{P}^-$                      | 161.5            |
| $(\text{P}=\text{CH}_2)^- \rightarrow \text{CH}_2 + {}^3\text{P}^-$                  | 128.6            |
| $(\text{P}=\text{CH}_2)^- \rightarrow {}^3\text{CH}_2 + \text{P}^-$                  | 144.4            |
| $(\text{P}=\text{CH}_2)^- \rightarrow {}^3\text{CH}_2 + {}^3\text{P}^-$              | 111.6            |
| $(\text{P}=\text{CH}_2)^- \rightarrow {}^2(\text{CH}_2)^- + {}^2\text{P}$            | 161.4            |
| $(\text{P}=\text{CH}_2)^- \rightarrow {}^2(\text{CH}_2)^- + {}^4\text{P}$            | 110.2            |
| $(\text{P}=\text{CH}_2)^- \rightarrow (\text{CH})^- + \text{PH}$                     | 204.5            |
| $(\text{P}=\text{CH}_2)^- \rightarrow (\text{CH})^- + {}^3\text{PH}$                 | 165.9            |
| $(\text{P}=\text{CH}_2)^- \rightarrow {}^3(\text{CH})^- + \text{PH}$                 | 172.1            |
| $(\text{P}=\text{CH}_2)^- \rightarrow {}^3(\text{CH})^- + {}^3\text{PH}$             | 133.5            |
| $(\text{P}=\text{CH}_2)^- \rightarrow {}^2\text{CH} + {}^2(\text{PH})^-$             | 145.3            |
| $(\text{P}=\text{CH}_2)^- \rightarrow \text{C} + (\text{PH}_2)^-$                    | 188.0            |
| $(\text{P}=\text{CH}_2)^- \rightarrow \text{C} + {}^3(\text{PH}_2)^-$                | 229.3            |
| $(\text{P}=\text{CH}_2)^- \rightarrow {}^3\text{C} + (\text{PH}_2)^-$                | 140.5            |
| $(\text{P}=\text{CH}_2)^- \rightarrow {}^3\text{C} + {}^3(\text{PH}_2)^-$            | 181.8            |
| $(\text{P}=\text{CH}_2)^- \rightarrow (\text{C}\equiv\text{P})^- + \text{H}_2$       | 22.9             |
| $(\text{P}=\text{CH}_2)^- \rightarrow {}^3(\text{C}\equiv\text{P})^- + \text{H}_2$   | 116.6            |
| $(\text{P}=\text{CH}_2)^- \rightarrow \text{P}^- + \text{C} + \text{H}_2$            | 272.4            |
| $(\text{P}=\text{CH}_2)^- \rightarrow \text{P}^- + {}^3\text{C} + \text{H}_2$        | 224.9            |
| $(\text{P}=\text{CH}_2)^- \rightarrow {}^3\text{P}^- + \text{C} + \text{H}_2$        | 239.5            |
| $(\text{P}=\text{CH}_2)^- \rightarrow {}^3\text{P}^- + {}^3\text{C} + \text{H}_2$    | 192.0            |
| $(\text{P}=\text{CH}_2)^- \rightarrow {}^2\text{P} + {}^2\text{C}^- + \text{H}_2$    | 267.3            |
| $(\text{P}=\text{CH}_2)^- \rightarrow {}^2\text{P} + {}^4\text{C}^- + \text{H}_2$    | 223.5            |
| $(\text{P}=\text{CH}_2)^- \rightarrow {}^4\text{P} + {}^2\text{C}^- + \text{H}_2$    | 216.0            |
| $(\text{P}=\text{CH}_2)^- \rightarrow {}^4\text{P} + {}^4\text{C}^- + \text{H}_2$    | 172.2            |
| $(\text{P}=\text{CH}_2)^- \rightarrow \text{H}-\text{C}\equiv\text{P} + \text{H}^-$  | 57.6             |
| $(\text{P}=\text{CH}_2)^- \rightarrow {}^3\text{H}-\text{P}=\text{C} + \text{H}^-$   | 135.8            |
| $(\text{P}=\text{CH}_2)^- \rightarrow {}^1\text{P}-\text{H}-\text{C} + {}^2\text{H}$ | 65.5             |
| $(\text{P}=\text{CH}_2)^- \rightarrow {}^3\text{P}-\text{H}-\text{C} + {}^2\text{H}$ | 157.8            |

**Table S3.** Reaction energies ( $E_r$  in kcal/mol) of the  $(\text{P}=\text{C}(\text{CH}_3)_2)^-$  fragmentation processes.

| Decomposition path                                                                                                                                                                                | $E_r$ [kcal/mol] |
|---------------------------------------------------------------------------------------------------------------------------------------------------------------------------------------------------|------------------|
| $(\text{P}=\text{C}(\text{CH}_3)_2)^- \rightarrow \text{CH}_4 + (\text{CH}_2\text{CP})^-$                                                                                                         | 10.0             |
| $(\text{P}=\text{C}(\text{CH}_3)_2)^- \rightarrow \text{CH}_4 + {}^3(\text{CH}_2\text{CP})^-$                                                                                                     | 48.6             |
| $(\text{P}=\text{C}(\text{CH}_3)_2)^- \rightarrow \text{CH}_4 + {}^3(\text{CHCHP})^-$                                                                                                             | 63.0             |
| $(\text{P}=\text{C}(\text{CH}_3)_2)^- \rightarrow \text{CH}_4 + (\text{CCPH}_2)^-$                                                                                                                | 40.3             |
| $(\text{P}=\text{C}(\text{CH}_3)_2)^- \rightarrow \text{CH}_4 + {}^3(\text{CCPH}_2)^-$                                                                                                            | 107.3            |
| $(\text{P}=\text{C}(\text{CH}_3)_2)^- \rightarrow \text{CH}_4 + (\text{CHCPH})^-$                                                                                                                 | 22.2             |
| $(\text{P}=\text{C}(\text{CH}_3)_2)^- \rightarrow \text{CH}_4 + {}^3(\text{CHCPH})^-$                                                                                                             | 74.5             |
| $(\text{P}=\text{C}(\text{CH}_3)_2)^- \rightarrow \text{CH}_4 + {}^3(\text{CCHPH})^-$                                                                                                             | 76.2             |
| $(\text{P}=\text{C}(\text{CH}_3)_2)^- \rightarrow \text{CH}_4 + (\text{CHPCH})^-$                                                                                                                 | 83.8             |
| $(\text{P}=\text{C}(\text{CH}_3)_2)^- \rightarrow \text{CH}_4 + {}^3(\text{CHPCH})^-$                                                                                                             | 97.2             |
| $(\text{P}=\text{C}(\text{CH}_3)_2)^- \rightarrow \text{CH}_4 + \left( \begin{array}{c} \text{P} \\ \diagup \quad \diagdown \\ \text{HC} \text{---} \text{CH} \end{array} \right)^-$              | 55.0             |
| $(\text{P}=\text{C}(\text{CH}_3)_2)^- \rightarrow \text{CH}_4 + {}^3 \left( \begin{array}{c} \text{P} \\ \diagup \quad \diagdown \\ \text{HC} \text{---} \text{CH} \end{array} \right)^-$         | 64.2             |
| $(\text{P}=\text{C}(\text{CH}_3)_2)^- \rightarrow \text{CH}_4 + (\text{CH}_2\text{PC})^-$                                                                                                         | 77.6             |
| $(\text{P}=\text{C}(\text{CH}_3)_2)^- \rightarrow \text{CH}_4 + {}^3(\text{CH}_2\text{PC})^-$                                                                                                     | 124.9            |
| $(\text{P}=\text{C}(\text{CH}_3)_2)^- \rightarrow \text{CH}_4 + \left( \begin{array}{c} \text{P} \\ \diagup \quad \diagdown \\ \text{H}_2\text{C} \text{---} \text{C} \end{array} \right)^-$      | 45.1             |
| $(\text{P}=\text{C}(\text{CH}_3)_2)^- \rightarrow \text{CH}_4 + {}^3 \left( \begin{array}{c} \text{P} \\ \diagup \quad \diagdown \\ \text{H}_2\text{C} \text{---} \text{C} \end{array} \right)^-$ | 89.7             |
| $(\text{P}=\text{C}(\text{CH}_3)_2)^- \rightarrow \text{CH}_4 + {}^3(\text{CHPHC})^-$                                                                                                             | 131.3            |
| $(\text{P}=\text{C}(\text{CH}_3)_2)^- \rightarrow (\text{CH}_3)^- + \text{CH}_3\text{CP}$                                                                                                         | 59.7             |
| $(\text{P}=\text{C}(\text{CH}_3)_2)^- \rightarrow (\text{CH}_3)^- + {}^3\text{CH}_3\text{CP}$                                                                                                     | 135.0            |
| $(\text{P}=\text{C}(\text{CH}_3)_2)^- \rightarrow (\text{CH}_3)^- + \text{CH}_2\text{CHP}$                                                                                                        | 123.2            |
| $(\text{P}=\text{C}(\text{CH}_3)_2)^- \rightarrow (\text{CH}_3)^- + {}^3\text{CH}_2\text{CHP}$                                                                                                    | 90.9             |
| $(\text{P}=\text{C}(\text{CH}_3)_2)^- \rightarrow (\text{CH}_3)^- + \text{CHCPH}_2$                                                                                                               | 89.2             |
| $(\text{P}=\text{C}(\text{CH}_3)_2)^- \rightarrow (\text{CH}_3)^- + {}^3\text{CHCPH}_2$                                                                                                           | 175.2            |
| $(\text{P}=\text{C}(\text{CH}_3)_2)^- \rightarrow (\text{CH}_3)^- + {}^3\text{CCHPH}_2$                                                                                                           | 187.9            |
| $(\text{P}=\text{C}(\text{CH}_3)_2)^- \rightarrow (\text{CH}_3)^- + {}^3\text{CHCHPH}$                                                                                                            | 127.3            |

|                                                                                                                                                                             |       |
|-----------------------------------------------------------------------------------------------------------------------------------------------------------------------------|-------|
| $(\text{P}=\text{C}(\text{CH}_3)_2)^- \rightarrow (\text{CH}_3)^- + \text{CCPH}_3$                                                                                          | 148.1 |
| $(\text{P}=\text{C}(\text{CH}_3)_2)^- \rightarrow (\text{CH}_3)^- + \text{CH}_2\text{PCH}$                                                                                  | 141.4 |
| $(\text{P}=\text{C}(\text{CH}_3)_2)^- \rightarrow (\text{CH}_3)^- + {}^3\text{CH}_2\text{PCH}$                                                                              | 140.2 |
| $(\text{P}=\text{C}(\text{CH}_3)_2)^- \rightarrow (\text{CH}_3)^- + \begin{array}{c} \text{CH}_2 \\ \diagup \quad \diagdown \\ \text{HC}=\text{P} \end{array}$              | 83.9  |
| $(\text{P}=\text{C}(\text{CH}_3)_2)^- \rightarrow (\text{CH}_3)^- + \begin{array}{c} \text{CH}_2 \\ \diagup \quad \diagdown \\ \text{HC}=\text{P} \\ \text{}^3 \end{array}$ | 127.8 |
| $(\text{P}=\text{C}(\text{CH}_3)_2)^- \rightarrow (\text{CH}_3)^- + \text{CHPHCH}$                                                                                          | 207.2 |
| $(\text{P}=\text{C}(\text{CH}_3)_2)^- \rightarrow (\text{CH}_3)^- + {}^3\text{CHPHCH}$                                                                                      | 194.4 |
| $(\text{P}=\text{C}(\text{CH}_3)_2)^- \rightarrow (\text{CH}_3)^- + \begin{array}{c} \text{CH} \\ \diagup \quad \diagdown \\ \text{HC}=\text{PH} \end{array}$               | 94.7  |
| $(\text{P}=\text{C}(\text{CH}_3)_2)^- \rightarrow (\text{CH}_3)^- + \text{CH}_3\text{PC}$                                                                                   | 132.8 |
| $(\text{P}=\text{C}(\text{CH}_3)_2)^- \rightarrow (\text{CH}_3)^- + {}^3\text{CH}_3\text{PC}$                                                                               | 164.4 |
| $(\text{P}=\text{C}(\text{CH}_3)_2)^- \rightarrow \text{CH}_2 + (\text{CH}_3\text{CHP})^-$                                                                                  | 121.1 |
| $(\text{P}=\text{C}(\text{CH}_3)_2)^- \rightarrow \text{CH}_2 + {}^3(\text{CH}_3\text{CHP})^-$                                                                              | 148.5 |
| $(\text{P}=\text{C}(\text{CH}_3)_2)^- \rightarrow {}^3\text{CH}_2 + (\text{CH}_3\text{CHP})^-$                                                                              | 104.1 |
| $(\text{P}=\text{C}(\text{CH}_3)_2)^- \rightarrow {}^3\text{CH}_2 + {}^3(\text{CH}_3\text{CHP})^-$                                                                          | 131.5 |
| $(\text{P}=\text{C}(\text{CH}_3)_2)^- \rightarrow \text{CH}_2 + {}^3(\text{CH}_2\text{CH}_2\text{P})^-$                                                                     | 163.1 |
| $(\text{P}=\text{C}(\text{CH}_3)_2)^- \rightarrow {}^3\text{CH}_2 + {}^3(\text{CH}_2\text{CH}_2\text{P})^-$                                                                 | 146.1 |
| $(\text{P}=\text{C}(\text{CH}_3)_2)^- \rightarrow \text{CH}_2 + (\text{CH}_2\text{CHPH})^-$                                                                                 | 115.3 |
| $(\text{P}=\text{C}(\text{CH}_3)_2)^- \rightarrow \text{CH}_2 + {}^3(\text{CH}_2\text{CHP})^- + \text{H}_2$                                                                 | 191.5 |
| $(\text{P}=\text{C}(\text{CH}_3)_2)^- \rightarrow {}^3\text{CH}_2 + (\text{CH}_2\text{CHPH})^-$                                                                             | 98.3  |
| $(\text{P}=\text{C}(\text{CH}_3)_2)^- \rightarrow {}^3\text{CH}_2 + {}^3(\text{CH}_2\text{CHP})^- + \text{H}_2$                                                             | 174.4 |
| $(\text{P}=\text{C}(\text{CH}_3)_2)^- \rightarrow \text{CH}_2 + (\text{CH}_2\text{CP})^- + \text{H}_2$                                                                      | 140.2 |
| $(\text{P}=\text{C}(\text{CH}_3)_2)^- \rightarrow \text{CH}_2 + {}^3(\text{CH}_3\text{CPH})^-$                                                                              | 173.4 |
| $(\text{P}=\text{C}(\text{CH}_3)_2)^- \rightarrow {}^3\text{CH}_2 + (\text{CH}_2\text{CP})^- + \text{H}_2$                                                                  | 123.1 |
| $(\text{P}=\text{C}(\text{CH}_3)_2)^- \rightarrow {}^3\text{CH}_2 + {}^3(\text{CH}_3\text{CPH})^-$                                                                          | 156.4 |
| $(\text{P}=\text{C}(\text{CH}_3)_2)^- \rightarrow \text{CH}_2 + (\text{CH}_2\text{CPH}_2)^-$                                                                                | 148.8 |
| $(\text{P}=\text{C}(\text{CH}_3)_2)^- \rightarrow {}^3\text{CH}_2 + (\text{CH}_2\text{CPH}_2)^-$                                                                            | 131.7 |
| $(\text{P}=\text{C}(\text{CH}_3)_2)^- \rightarrow \text{CH}_2 + {}^3(\text{CCH}_2\text{PH}_2)^-$                                                                            | 208.5 |
| $(\text{P}=\text{C}(\text{CH}_3)_2)^- \rightarrow {}^3\text{CH}_2 + {}^3(\text{CCH}_2\text{PH}_2)^-$                                                                        | 191.5 |
| $(\text{P}=\text{C}(\text{CH}_3)_2)^- \rightarrow \text{CH}_2 + (\text{CHCHPH}_2)^-$                                                                                        | 157.7 |
| $(\text{P}=\text{C}(\text{CH}_3)_2)^- \rightarrow \text{CH}_2 + {}^3(\text{CHCHPH}_2)^-$                                                                                    | 199.7 |

|                                                                                                                                                       |       |
|-------------------------------------------------------------------------------------------------------------------------------------------------------|-------|
| $(\text{P}=\text{C}(\text{CH}_3)_2)^- \rightarrow {}^3\text{CH}_2 + (\text{CHCHPH}_2)^-$                                                              | 140.7 |
| $(\text{P}=\text{C}(\text{CH}_3)_2)^- \rightarrow {}^3\text{CH}_2 + {}^3(\text{CHCHPH}_2)^-$                                                          | 182.7 |
| $(\text{P}=\text{C}(\text{CH}_3)_2)^- \rightarrow \text{CH}_2 + \text{PH}_3 + (\text{CHC})^-$                                                         | 166.8 |
| $(\text{P}=\text{C}(\text{CH}_3)_2)^- \rightarrow {}^3\text{CH}_2 + \text{PH}_3 + (\text{CHC})^-$                                                     | 149.8 |
| $(\text{P}=\text{C}(\text{CH}_3)_2)^- \rightarrow \text{CH}_2 + \text{PH}_3 + (\text{CHC})^-$                                                         | 167.3 |
| $(\text{P}=\text{C}(\text{CH}_3)_2)^- \rightarrow \text{CH}_2 + {}^3(\text{CCHPH}_3)^-$                                                               | 237.4 |
| $(\text{P}=\text{C}(\text{CH}_3)_2)^- \rightarrow {}^3\text{CH}_2 + \text{PH}_3 + (\text{CHC})^-$                                                     | 150.3 |
| $(\text{P}=\text{C}(\text{CH}_3)_2)^- \rightarrow {}^3\text{CH}_2 + {}^3(\text{CCHPH}_3)^-$                                                           | 220.4 |
| $(\text{P}=\text{C}(\text{CH}_3)_2)^- \rightarrow \text{CH}_2 + (\text{CCPH}_4)^-$                                                                    | 211.1 |
| $(\text{P}=\text{C}(\text{CH}_3)_2)^- \rightarrow {}^3\text{CH}_2 + (\text{CCPH}_4)^-$                                                                | 194.1 |
| $(\text{P}=\text{C}(\text{CH}_3)_2)^- \rightarrow \text{CH}_2 + (\text{CH}_2\text{PCH}_2)^-$                                                          | 126.1 |
| $(\text{P}=\text{C}(\text{CH}_3)_2)^- \rightarrow \text{CH}_2 + {}^3(\text{CH}_2\text{PCH}_2)^-$                                                      | 169.8 |
| $(\text{P}=\text{C}(\text{CH}_3)_2)^- \rightarrow {}^3\text{CH}_2 + (\text{CH}_2\text{PCH}_2)^-$                                                      | 109.1 |
| $(\text{P}=\text{C}(\text{CH}_3)_2)^- \rightarrow {}^3\text{CH}_2 + {}^3(\text{CH}_2\text{PCH}_2)^-$                                                  | 152.8 |
| $(\text{P}=\text{C}(\text{CH}_3)_2)^- \rightarrow \text{CH}_2 + (\text{CH}_3\text{PCH})^-$                                                            | 141.2 |
| $(\text{P}=\text{C}(\text{CH}_3)_2)^- \rightarrow \text{CH}_2 + {}^3(\text{CH}_3\text{PCH})^-$                                                        | 174.3 |
| $(\text{P}=\text{C}(\text{CH}_3)_2)^- \rightarrow {}^3\text{CH}_2 + (\text{CH}_3\text{PCH})^-$                                                        | 124.2 |
| $(\text{P}=\text{C}(\text{CH}_3)_2)^- \rightarrow {}^3\text{CH}_2 + {}^3(\text{CH}_3\text{PCH})^-$                                                    | 157.2 |
| $(\text{P}=\text{C}(\text{CH}_3)_2)^- \rightarrow \text{CH}_2 + (\text{CH}_2\text{PHCH})^-$                                                           | 176.0 |
| $(\text{P}=\text{C}(\text{CH}_3)_2)^- \rightarrow \text{CH}_2 + {}^3(\text{CH}_2\text{PHCH})^-$                                                       | 205.5 |
| $(\text{P}=\text{C}(\text{CH}_3)_2)^- \rightarrow {}^3\text{CH}_2 + (\text{CH}_2\text{PHCH})^-$                                                       | 159.0 |
| $(\text{P}=\text{C}(\text{CH}_3)_2)^- \rightarrow {}^3\text{CH}_2 + {}^3(\text{CH}_2\text{PHCH})^-$                                                   | 188.5 |
| $(\text{P}=\text{C}(\text{CH}_3)_2)^- \rightarrow \text{CH}_2 + \left( \begin{array}{c} \text{CH}_2 \\ \text{HC}=\text{PH} \end{array} \right)^-$     | 148.3 |
| $(\text{P}=\text{C}(\text{CH}_3)_2)^- \rightarrow {}^3\text{CH}_2 + \left( \begin{array}{c} \text{CH}_2 \\ \text{HC}=\text{PH} \end{array} \right)^-$ | 131.2 |
| $(\text{P}=\text{C}(\text{CH}_3)_2)^- \rightarrow \text{CH}_2 + {}^3(\text{CH}_3\text{PHC})^-$                                                        | 228.0 |
| $(\text{P}=\text{C}(\text{CH}_3)_2)^- \rightarrow {}^3\text{CH}_2 + {}^3(\text{CH}_3\text{PHC})^-$                                                    | 211.0 |
| $(\text{P}=\text{C}(\text{CH}_3)_2)^- \rightarrow \text{CH}_2 + {}^3(\text{CH}_2\text{PH}_2\text{C})^-$                                               | 231.2 |
| $(\text{P}=\text{C}(\text{CH}_3)_2)^- \rightarrow {}^3\text{CH}_2 + {}^3(\text{CH}_2\text{PH}_2\text{C})^-$                                           | 214.2 |
| $(\text{P}=\text{C}(\text{CH}_3)_2)^- \rightarrow \text{CH}_2 + \left( \begin{array}{c} \text{CH} \\ \text{HC}=\text{PH}_2 \end{array} \right)^-$     | 211.4 |



|                                                                                                                                                        |       |
|--------------------------------------------------------------------------------------------------------------------------------------------------------|-------|
| $(\text{P}=\text{C}(\text{CH}_3)_2)^- \rightarrow {}^3\text{CH}_2 +$  | 194.4 |
| $(\text{P}=\text{C}(\text{CH}_3)_2)^- \rightarrow \text{CH}_2 + {}^3(\text{CHPH}_2\text{CH})^-$                                                        | 242.8 |
| $(\text{P}=\text{C}(\text{CH}_3)_2)^- \rightarrow {}^3\text{CH}_2 + {}^3(\text{CHPH}_2\text{CH})^-$                                                    | 225.8 |
| $(\text{P}=\text{C}(\text{CH}_3)_2)^- \rightarrow (\text{CH})^- + \text{CH}_3\text{CH}_2\text{P}$                                                      | 204.5 |
| $(\text{P}=\text{C}(\text{CH}_3)_2)^- \rightarrow (\text{CH})^- + {}^3\text{CH}_3\text{CH}_2\text{P}$                                                  | 171.7 |
| $(\text{P}=\text{C}(\text{CH}_3)_2)^- \rightarrow {}^3(\text{CH})^- + \text{CH}_3\text{CH}_2\text{P}$                                                  | 172.1 |
| $(\text{P}=\text{C}(\text{CH}_3)_2)^- \rightarrow {}^3(\text{CH})^- + {}^3\text{CH}_3\text{CH}_2\text{P}$                                              | 139.3 |
| $(\text{P}=\text{C}(\text{CH}_3)_2)^- \rightarrow (\text{CH})^- + \text{CH}_3\text{CHPH}$                                                              | 157.0 |
| $(\text{P}=\text{C}(\text{CH}_3)_2)^- \rightarrow (\text{CH})^- + {}^3\text{CH}_3\text{CHPH}$                                                          | 202.1 |
| $(\text{P}=\text{C}(\text{CH}_3)_2)^- \rightarrow {}^3(\text{CH})^- + \text{CH}_3\text{CHPH}$                                                          | 124.6 |
| $(\text{P}=\text{C}(\text{CH}_3)_2)^- \rightarrow {}^3(\text{CH})^- + {}^3\text{CH}_3\text{CHPH}$                                                      | 169.7 |
| $(\text{P}=\text{C}(\text{CH}_3)_2)^- \rightarrow (\text{CH})^- + \text{CH}_3\text{CPH}_2$                                                             | 220.2 |
| $(\text{P}=\text{C}(\text{CH}_3)_2)^- \rightarrow (\text{CH})^- + {}^3\text{CH}_3\text{CPH}_2$                                                         | 225.8 |
| $(\text{P}=\text{C}(\text{CH}_3)_2)^- \rightarrow {}^3(\text{CH})^- + \text{CH}_3\text{CPH}_2$                                                         | 187.8 |
| $(\text{P}=\text{C}(\text{CH}_3)_2)^- \rightarrow {}^3(\text{CH})^- + {}^3\text{CH}_3\text{CPH}_2$                                                     | 193.4 |
| $(\text{P}=\text{C}(\text{CH}_3)_2)^- \rightarrow (\text{CH})^- + \text{CH}_2\text{CHPH}_2$                                                            | 162.0 |
| $(\text{P}=\text{C}(\text{CH}_3)_2)^- \rightarrow (\text{CH})^- + {}^3\text{CH}_2\text{CHPH}_2$                                                        | 225.9 |
| $(\text{P}=\text{C}(\text{CH}_3)_2)^- \rightarrow {}^3(\text{CH})^- + \text{CH}_2\text{CHPH}_2$                                                        | 129.6 |
| $(\text{P}=\text{C}(\text{CH}_3)_2)^- \rightarrow {}^3(\text{CH})^- + {}^3\text{CH}_2\text{CHPH}_2$                                                    | 193.5 |
| $(\text{P}=\text{C}(\text{CH}_3)_2)^- \rightarrow (\text{CH})^- + \text{CH}_2\text{CPH}_3$                                                             | 220.2 |
| $(\text{P}=\text{C}(\text{CH}_3)_2)^- \rightarrow {}^3(\text{CH})^- + \text{CH}_2\text{CPH}_3$                                                         | 187.8 |
| $(\text{P}=\text{C}(\text{CH}_3)_2)^- \rightarrow (\text{CH})^- + \text{CH}_3\text{PCH}_2$                                                             | 156.1 |
| $(\text{P}=\text{C}(\text{CH}_3)_2)^- \rightarrow (\text{CH})^- + {}^3\text{CH}_3\text{PCH}_2$                                                         | 200.0 |
| $(\text{P}=\text{C}(\text{CH}_3)_2)^- \rightarrow {}^3(\text{CH})^- + \text{CH}_3\text{PCH}_2$                                                         | 123.7 |
| $(\text{P}=\text{C}(\text{CH}_3)_2)^- \rightarrow {}^3(\text{CH})^- + {}^3\text{CH}_3\text{PCH}_2$                                                     | 167.5 |
| $(\text{P}=\text{C}(\text{CH}_3)_2)^- \rightarrow (\text{CH})^- + \text{CH}_3\text{PHCH}$                                                              | 212.4 |
| $(\text{P}=\text{C}(\text{CH}_3)_2)^- \rightarrow (\text{CH})^- + {}^3\text{CH}_3\text{PHCH}$                                                          | 224.5 |
| $(\text{P}=\text{C}(\text{CH}_3)_2)^- \rightarrow {}^3(\text{CH})^- + \text{CH}_3\text{PHCH}$                                                          | 180.0 |
| $(\text{P}=\text{C}(\text{CH}_3)_2)^- \rightarrow {}^3(\text{CH})^- + {}^3\text{CH}_3\text{PHCH}$                                                      | 192.1 |
| $(\text{P}=\text{C}(\text{CH}_3)_2)^- \rightarrow (\text{CH})^- + \text{CH}_2\text{PHCH}_2$                                                            | 197.8 |
| $(\text{P}=\text{C}(\text{CH}_3)_2)^- \rightarrow (\text{CH})^- + {}^3\text{CH}_2\text{PHCH}_2$                                                        | 221.3 |

|                                                                                                                                                                                                              |       |
|--------------------------------------------------------------------------------------------------------------------------------------------------------------------------------------------------------------|-------|
| $(\text{P}=\text{C}(\text{CH}_3)_2)^- \rightarrow {}^3(\text{CH})^- + \text{CH}_2\text{PHCH}_2$                                                                                                              | 165.4 |
| $(\text{P}=\text{C}(\text{CH}_3)_2)^- \rightarrow {}^3(\text{CH})^- + {}^3\text{CH}_2\text{PHCH}_2$                                                                                                          | 188.9 |
| $(\text{P}=\text{C}(\text{CH}_3)_2)^- \rightarrow (\text{CH})^- + \begin{array}{c} \text{CH}_2 \\ \diagup \quad \diagdown \\ \text{H}_2\text{C} \quad \text{—} \quad \text{PH} \end{array}$                  | 155.3 |
| $(\text{P}=\text{C}(\text{CH}_3)_2)^- \rightarrow (\text{CH})^- + \begin{array}{c} \text{CH}_2 \\ \diagup \quad \diagdown \\ \text{H}_2\text{C} \quad \text{—} \quad \text{PH} \\ \text{}^3 \end{array}$     | 202.9 |
| $(\text{P}=\text{C}(\text{CH}_3)_2)^- \rightarrow {}^3(\text{CH})^- + \begin{array}{c} \text{CH}_2 \\ \diagup \quad \diagdown \\ \text{H}_2\text{C} \quad \text{—} \quad \text{PH} \end{array}$              | 122.9 |
| $(\text{P}=\text{C}(\text{CH}_3)_2)^- \rightarrow {}^3(\text{CH})^- + \begin{array}{c} \text{CH}_2 \\ \diagup \quad \diagdown \\ \text{H}_2\text{C} \quad \text{—} \quad \text{PH} \\ \text{}^3 \end{array}$ | 170.5 |
| $(\text{P}=\text{C}(\text{CH}_3)_2)^- \rightarrow (\text{CH})^- + {}^3\text{CH}_2\text{PH}_2\text{CH}$                                                                                                       | 275.3 |
| $(\text{P}=\text{C}(\text{CH}_3)_2)^- \rightarrow {}^3(\text{CH})^- + {}^3\text{CH}_2\text{PH}_2\text{CH}$                                                                                                   | 243.0 |
| $(\text{P}=\text{C}(\text{CH}_3)_2)^- \rightarrow \text{C} + (\text{CH}_3\text{CH}_2\text{PH})^-$                                                                                                            | 199.8 |
| $(\text{P}=\text{C}(\text{CH}_3)_2)^- \rightarrow {}^3\text{C} + (\text{CH}_3\text{CH}_2\text{PH})^-$                                                                                                        | 152.3 |
| $(\text{P}=\text{C}(\text{CH}_3)_2)^- \rightarrow \text{C} + (\text{CH}_3\text{CHPH}_2)^-$                                                                                                                   | 225.2 |
| $(\text{P}=\text{C}(\text{CH}_3)_2)^- \rightarrow {}^3\text{C} + (\text{CH}_3\text{CHPH}_2)^-$                                                                                                               | 177.6 |
| $(\text{P}=\text{C}(\text{CH}_3)_2)^- \rightarrow \text{C} + (\text{CH}_2\text{CH}_2\text{PH}_2)^-$                                                                                                          | 219.6 |
| $(\text{P}=\text{C}(\text{CH}_3)_2)^- \rightarrow {}^3\text{C} + (\text{CH}_2\text{CH}_2\text{PH}_2)^-$                                                                                                      | 172.0 |
| $(\text{P}=\text{C}(\text{CH}_3)_2)^- \rightarrow \text{C} + (\text{CH}_3\text{CPH}_3)^-$                                                                                                                    | 282.3 |
| $(\text{P}=\text{C}(\text{CH}_3)_2)^- \rightarrow {}^3\text{C} + (\text{CH}_3\text{CPH}_3)^-$                                                                                                                | 234.8 |
| $(\text{P}=\text{C}(\text{CH}_3)_2)^- \rightarrow \text{C} + (\text{CH}_2\text{CPH}_4)^-$                                                                                                                    | 292.3 |
| $(\text{P}=\text{C}(\text{CH}_3)_2)^- \rightarrow {}^3\text{C} + (\text{CH}_2\text{CPH}_4)^-$                                                                                                                | 244.8 |
| $(\text{P}=\text{C}(\text{CH}_3)_2)^- \rightarrow \text{C} + (\text{CHCHPH}_4)^-$                                                                                                                            | 300.1 |
| $(\text{P}=\text{C}(\text{CH}_3)_2)^- \rightarrow \text{C} + {}^3(\text{CHCHPH}_4)^-$                                                                                                                        | 336.8 |
| $(\text{P}=\text{C}(\text{CH}_3)_2)^- \rightarrow {}^3\text{C} + (\text{CHCHPH}_4)^-$                                                                                                                        | 252.5 |
| $(\text{P}=\text{C}(\text{CH}_3)_2)^- \rightarrow {}^3\text{C} + {}^3(\text{CHCHPH}_4)^-$                                                                                                                    | 289.3 |
| $(\text{P}=\text{C}(\text{CH}_3)_2)^- \rightarrow \text{C} + (\text{CH}_3\text{PHCH}_2)^-$                                                                                                                   | 220.1 |
| $(\text{P}=\text{C}(\text{CH}_3)_2)^- \rightarrow {}^3\text{C} + (\text{CH}_3\text{PHCH}_2)^-$                                                                                                               | 172.6 |
| $(\text{P}=\text{C}(\text{CH}_3)_2)^- \rightarrow \text{C} + (\text{CH}_3\text{PH}_2\text{CH})^-$                                                                                                            | 268.2 |
| $(\text{P}=\text{C}(\text{CH}_3)_2)^- \rightarrow {}^3\text{C} + (\text{CH}_3\text{PH}_2\text{CH})^-$                                                                                                        | 220.7 |
| $(\text{P}=\text{C}(\text{CH}_3)_2)^- \rightarrow \text{C} + {}^3(\text{CH}_3\text{PH}_3\text{C})^-$                                                                                                         | 338.2 |
| $(\text{P}=\text{C}(\text{CH}_3)_2)^- \rightarrow {}^3\text{C} + {}^3(\text{CH}_3\text{PH}_3\text{C})^-$                                                                                                     | 290.8 |
| $(\text{P}=\text{C}(\text{CH}_3)_2)^- \rightarrow \text{C} + (\text{CH}_2\text{PH}_2\text{CH}_2)^-$                                                                                                          | 248.9 |

|                                                                                                                                                                                       |       |
|---------------------------------------------------------------------------------------------------------------------------------------------------------------------------------------|-------|
| $(\text{P}=\text{C}(\text{CH}_3)_2)^- \rightarrow {}^3\text{C} + (\text{CH}_2\text{PH}_2\text{CH}_2)^-$                                                                               | 201.3 |
| $(\text{P}=\text{C}(\text{CH}_3)_2)^- \rightarrow \text{C} + {}^3(\text{CH}_2\text{PH}_3\text{CH})^-$                                                                                 | 344.9 |
| $(\text{P}=\text{C}(\text{CH}_3)_2)^- \rightarrow {}^3\text{C} + {}^3(\text{CH}_2\text{PH}_3\text{CH})^-$                                                                             | 297.3 |
| $(\text{P}=\text{C}(\text{CH}_3)_2)^- \rightarrow \text{C} + \left( \begin{array}{c} \text{CH}_2 \\ \diagup \quad \diagdown \\ \text{HC} \quad \text{PH}_3 \end{array} \right)^-$     | 291.5 |
| $(\text{P}=\text{C}(\text{CH}_3)_2)^- \rightarrow {}^3\text{C} + \left( \begin{array}{c} \text{CH}_2 \\ \diagup \quad \diagdown \\ \text{HC} \quad \text{PH}_3 \end{array} \right)^-$ | 244.0 |
| $(\text{P}=\text{C}(\text{CH}_3)_2)^- \rightarrow {}^3\text{C} + (\text{CHPH}_4\text{CH})^-$                                                                                          | 297.1 |
| $(\text{P}=\text{C}(\text{CH}_3)_2)^- \rightarrow \text{C} + (\text{CHPH}_4\text{CH})^-$                                                                                              | 249.6 |
| $(\text{P}=\text{C}(\text{CH}_3)_2)^- \rightarrow (\text{P})^- + \text{CH}_3\text{CCH}_3$                                                                                             | 150.1 |
| $(\text{P}=\text{C}(\text{CH}_3)_2)^- \rightarrow (\text{P})^- + {}^3\text{CH}_3\text{CCH}_3$                                                                                         | 145.8 |
| $(\text{P}=\text{C}(\text{CH}_3)_2)^- \rightarrow {}^3(\text{P})^- + \text{CH}_3\text{CCH}_3$                                                                                         | 117.3 |
| $(\text{P}=\text{C}(\text{CH}_3)_2)^- \rightarrow {}^3(\text{P})^- + {}^3\text{CH}_3\text{CCH}_3$                                                                                     | 113.0 |
| $(\text{P}=\text{C}(\text{CH}_3)_2)^- \rightarrow (\text{P})^- + \text{CH}_3\text{CHCH}_2$                                                                                            | 77.4  |
| $(\text{P}=\text{C}(\text{CH}_3)_2)^- \rightarrow (\text{P})^- + {}^3\text{CH}_3\text{CHCH}_2$                                                                                        | 145.4 |
| $(\text{P}=\text{C}(\text{CH}_3)_2)^- \rightarrow {}^3(\text{P})^- + \text{CH}_3\text{CHCH}_2$                                                                                        | 44.6  |
| $(\text{P}=\text{C}(\text{CH}_3)_2)^- \rightarrow {}^3(\text{P})^- + {}^3\text{CH}_3\text{CHCH}_2$                                                                                    | 112.5 |
| $(\text{P}=\text{C}(\text{CH}_3)_2)^- \rightarrow (\text{P})^- + {}^3\text{CH}_3\text{CH}_2\text{CH}$                                                                                 | 149.9 |
| $(\text{P}=\text{C}(\text{CH}_3)_2)^- \rightarrow {}^3(\text{P})^- + {}^3\text{CH}_3\text{CH}_2\text{CH}$                                                                             | 117.0 |
| $(\text{P}=\text{C}(\text{CH}_3)_2)^- \rightarrow (\text{P})^- + \text{CH}_2\text{CH}_2\text{CH}_2$                                                                                   | 156.3 |
| $(\text{P}=\text{C}(\text{CH}_3)_2)^- \rightarrow (\text{P})^- + {}^3\text{CH}_2\text{CH}_2\text{CH}_2$                                                                               | 146.3 |
| $(\text{P}=\text{C}(\text{CH}_3)_2)^- \rightarrow {}^3(\text{P})^- + \text{CH}_2\text{CH}_2\text{CH}_2$                                                                               | 123.5 |
| $(\text{P}=\text{C}(\text{CH}_3)_2)^- \rightarrow {}^3(\text{P})^- + {}^3\text{CH}_2\text{CH}_2\text{CH}_2$                                                                           | 113.5 |
| $(\text{P}=\text{C}(\text{CH}_3)_2)^- \rightarrow (\text{P})^- + \begin{array}{c} \text{CH}_2 \\ \diagup \quad \diagdown \\ \text{H}_2\text{C} \quad \text{CH}_2 \end{array}$         | 83.6  |
| $(\text{P}=\text{C}(\text{CH}_3)_2)^- \rightarrow {}^3(\text{P})^- + \begin{array}{c} \text{CH}_2 \\ \diagup \quad \diagdown \\ \text{H}_2\text{C} \quad \text{CH}_2 \end{array}$     | 50.8  |
| $(\text{P}=\text{C}(\text{CH}_3)_2)^- \rightarrow \text{PH} + (\text{CH}_3\text{CCH}_2)^-$                                                                                            | 124.3 |
| $(\text{P}=\text{C}(\text{CH}_3)_2)^- \rightarrow {}^3\text{PH} + (\text{CH}_3\text{CCH}_2)^-$                                                                                        | 85.6  |
| $(\text{P}=\text{C}(\text{CH}_3)_2)^- \rightarrow \text{PH} + (\text{CH}_3\text{CHCH})^-$                                                                                             | 125.3 |
| $(\text{P}=\text{C}(\text{CH}_3)_2)^- \rightarrow {}^3\text{PH} + (\text{CH}_3\text{CHCH})^-$                                                                                         | 86.6  |
| $(\text{P}=\text{C}(\text{CH}_3)_2)^- \rightarrow \text{PH} + (\text{CH}_2\text{CHCH}_2)^-$                                                                                           | 108.0 |
| $(\text{P}=\text{C}(\text{CH}_3)_2)^- \rightarrow {}^3\text{PH} + (\text{CH}_2\text{CHCH}_2)^-$                                                                                       | 69.3  |

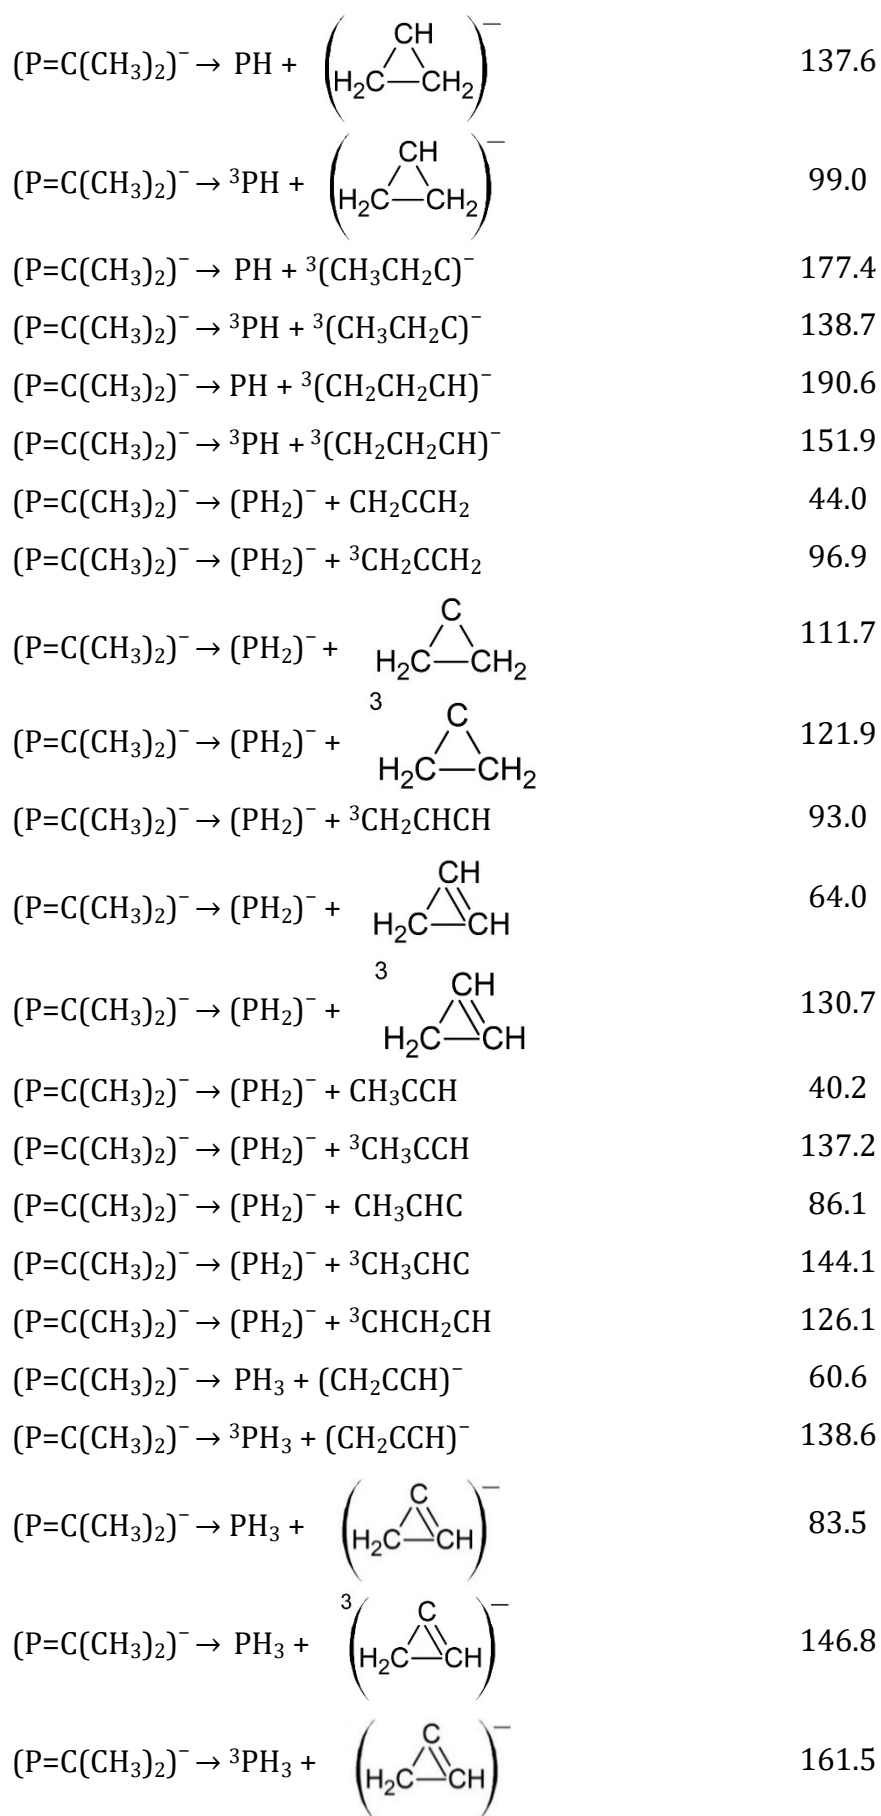

|                                                                                                                                                                        |       |
|------------------------------------------------------------------------------------------------------------------------------------------------------------------------|-------|
| $(\text{P}=\text{C}(\text{CH}_3)_2)^- \rightarrow {}^3\text{PH}_3 + \left( \begin{array}{c} \text{C} \\ \text{H}_2\text{C} \text{---} \text{CH} \end{array} \right)^-$ | 224.8 |
| $(\text{P}=\text{C}(\text{CH}_3)_2)^- \rightarrow \text{PH}_3 + (\text{CH}_3\text{CC})^-$                                                                              | 56.3  |
| $(\text{P}=\text{C}(\text{CH}_3)_2)^- \rightarrow {}^3\text{PH}_3 + (\text{CH}_3\text{CC})^-$                                                                          | 134.2 |
| $(\text{P}=\text{C}(\text{CH}_3)_2)^- \rightarrow \text{PH}_3 + (\text{CHCHCH})^-$                                                                                     | 136.7 |
| $(\text{P}=\text{C}(\text{CH}_3)_2)^- \rightarrow \text{PH}_3 + {}^3(\text{CHCHCH})^-$                                                                                 | 136.2 |
| $(\text{P}=\text{C}(\text{CH}_3)_2)^- \rightarrow {}^3\text{PH}_3 + (\text{CHCHCH})^-$                                                                                 | 214.7 |
| $(\text{P}=\text{C}(\text{CH}_3)_2)^- \rightarrow {}^3\text{PH}_3 + {}^3(\text{CHCHCH})^-$                                                                             | 214.2 |
| $(\text{P}=\text{C}(\text{CH}_3)_2)^- \rightarrow \text{PH}_3 + \left( \begin{array}{c} \text{CH} \\ \text{HC} \text{---} \text{CH} \end{array} \right)^-$             | 119.0 |
| $(\text{P}=\text{C}(\text{CH}_3)_2)^- \rightarrow \text{PH}_3 + {}^3 \left( \begin{array}{c} \text{CH} \\ \text{HC} \text{---} \text{CH} \end{array} \right)^-$        | 127.0 |
| $(\text{P}=\text{C}(\text{CH}_3)_2)^- \rightarrow {}^3\text{PH}_3 + \left( \begin{array}{c} \text{CH} \\ \text{HC} \text{---} \text{CH} \end{array} \right)^-$         | 197.0 |
| $(\text{P}=\text{C}(\text{CH}_3)_2)^- \rightarrow {}^3\text{PH}_3 + {}^3 \left( \begin{array}{c} \text{CH} \\ \text{HC} \text{---} \text{CH} \end{array} \right)^-$    | 205.0 |
| $(\text{P}=\text{C}(\text{CH}_3)_2)^- \rightarrow (\text{PH}_4)^- + \text{CHCCH}$                                                                                      | 182.4 |
| $(\text{P}=\text{C}(\text{CH}_3)_2)^- \rightarrow (\text{PH}_4)^- + {}^3\text{CHCCH}$                                                                                  | 166.8 |
| $(\text{P}=\text{C}(\text{CH}_3)_2)^- \rightarrow (\text{PH}_4)^- + \begin{array}{c} \text{C} \\ \text{HC} \text{---} \text{CH} \end{array}$                           | 152.3 |
| $(\text{P}=\text{C}(\text{CH}_3)_2)^- \rightarrow (\text{PH}_4)^- + {}^3 \begin{array}{c} \text{C} \\ \text{HC} \text{---} \text{CH} \end{array}$                      | 203.3 |
| $(\text{P}=\text{C}(\text{CH}_3)_2)^- \rightarrow (\text{PH}_4)^- + \text{CH}_2\text{CC}$                                                                              | 170.2 |
| $(\text{P}=\text{C}(\text{CH}_3)_2)^- \rightarrow (\text{PH}_4)^- + {}^3\text{CH}_2\text{CC}$                                                                          | 205.0 |
| $(\text{P}=\text{C}(\text{CH}_3)_2)^- \rightarrow \text{H}_2 + (\text{CH}_3\text{PCCH})^-$                                                                             | 39.2  |
| $(\text{P}=\text{C}(\text{CH}_3)_2)^- \rightarrow \text{H}_2 + {}^3(\text{CH}_3\text{PCCH})^-$                                                                         | 86.2  |
| $(\text{P}=\text{C}(\text{CH}_3)_2)^- \rightarrow \text{H}_2 + (\text{CH}_2\text{PCHCH})^-$                                                                            | 65.1  |
| $(\text{P}=\text{C}(\text{CH}_3)_2)^- \rightarrow \text{H}_2 + {}^3(\text{CH}_2\text{PCHCH})^-$                                                                        | 93.4  |
| $(\text{P}=\text{C}(\text{CH}_3)_2)^- \rightarrow \text{H}_2 + (\text{CH}_2\text{CPCH}_2)^-$                                                                           | 55.2  |
| $(\text{P}=\text{C}(\text{CH}_3)_2)^- \rightarrow \text{H}_2 + {}^3(\text{CH}_2\text{CPCH}_2)^-$                                                                       | 85.9  |
| $(\text{P}=\text{C}(\text{CH}_3)_2)^- \rightarrow \text{H}_2 + (\text{CH}_3\text{CHCP})^-$                                                                             | 25.5  |
| $(\text{P}=\text{C}(\text{CH}_3)_2)^- \rightarrow \text{H}_2 + {}^3(\text{CH}_3\text{CHCP})^-$                                                                         | 60.4  |

|                                                                                                                                                                                                                          |       |
|--------------------------------------------------------------------------------------------------------------------------------------------------------------------------------------------------------------------------|-------|
| $(\text{P}=\text{C}(\text{CH}_3)_2)^- \rightarrow \text{H}_2 + (\text{CH}_2\text{CHCP})^-$                                                                                                                               | 32.5  |
| $(\text{P}=\text{C}(\text{CH}_3)_2)^- \rightarrow \text{H}_2 + {}^3(\text{CH}_2\text{CHCP})^-$                                                                                                                           | 48.0  |
| $(\text{P}=\text{C}(\text{CH}_3)_2)^- \rightarrow \text{H}_2 + (\text{CH}_2\text{CCHPH})^-$                                                                                                                              | 44.4  |
| $(\text{P}=\text{C}(\text{CH}_3)_2)^- \rightarrow \text{H}_2 + {}^3(\text{CH}_2\text{CCH}_2\text{P})^-$                                                                                                                  | 86.6  |
| $(\text{P}=\text{C}(\text{CH}_3)_2)^- \rightarrow \text{H}_2 + \left( \begin{array}{l} \text{H}_3\text{C} \\ \diagdown \\ \text{C}=\text{P} \\ \diagup \\ \text{HC} \end{array} \right)^-$                               | 63.5  |
| $(\text{P}=\text{C}(\text{CH}_3)_2)^- \rightarrow \text{H}_2 + {}^3 \left( \begin{array}{l} \text{H}_3\text{C} \\ \diagdown \\ \text{C}=\text{P} \\ \diagup \\ \text{HC} \end{array} \right)^-$                          | 78.4  |
| $(\text{P}=\text{C}(\text{CH}_3)_2)^- \rightarrow \text{H}_2 + \left( \begin{array}{l} \text{H}_2\text{C} \\ \diagdown \\ \text{C}=\text{P} \\ \diagup \\ \text{H}_2\text{C} \end{array} \right)^-$                      | 34.4  |
| $(\text{P}=\text{C}(\text{CH}_3)_2)^- \rightarrow \text{H}_2 + {}^3 \left( \begin{array}{l} \text{H}_2\text{C} \\ \diagdown \\ \text{C}=\text{P} \\ \diagup \\ \text{H}_2\text{C} \end{array} \right)^-$                 | 66.3  |
| $(\text{P}=\text{C}(\text{CH}_3)_2)^- \rightarrow \text{H}_2 + \left( \begin{array}{l} \text{H}_3\text{C} \\ \diagdown \\ \text{CH}=\text{P} \\ \diagup \\ \text{C} \end{array} \right)^-$                               | 101.5 |
| $(\text{P}=\text{C}(\text{CH}_3)_2)^- \rightarrow \text{H}_2 + \left( \begin{array}{c} \text{P} \\ \diagup \quad \diagdown \\ \text{HC} \quad \text{CH}_2 \\ \diagdown \quad \diagup \\ \text{CH} \end{array} \right)^-$ | 62.9  |
| $(\text{P}=\text{C}(\text{CH}_3)_2)^- \rightarrow \text{H}_2 + \left( \begin{array}{l} \text{H}_2\text{C} \\ \diagdown \\ \text{P}=\text{C} \\ \diagup \\ \text{H}_2\text{C} \end{array} \right)^-$                      | 113.5 |
| $(\text{P}=\text{C}(\text{CH}_3)_2)^- \rightarrow \text{H}_2 + {}^3 \left( \begin{array}{l} \text{H}_2\text{C} \\ \diagdown \\ \text{P}=\text{C} \\ \diagup \\ \text{H}_2\text{C} \end{array} \right)^-$                 | 130.8 |
| $(\text{P}=\text{C}(\text{CH}_3)_2)^- \rightarrow \text{H}_2 + \left( \begin{array}{l} \text{H}_2\text{C} \\ \diagdown \\ \text{P}=\text{CH} \\ \diagup \\ \text{HC} \end{array} \right)^-$                              | 135.4 |
| $(\text{P}=\text{C}(\text{CH}_3)_2)^- \rightarrow \text{H}_2 + {}^3 \left( \begin{array}{l} \text{H}_2\text{C} \\ \diagdown \\ \text{P}=\text{CH} \\ \diagup \\ \text{HC} \end{array} \right)^-$                         | 147.0 |
| $(\text{P}=\text{C}(\text{CH}_3)_2)^- \rightarrow \text{H}_2 + \left( \begin{array}{l} \text{H}_3\text{C} \\ \diagdown \\ \text{P}=\text{CH} \\ \diagup \\ \text{C} \end{array} \right)^-$                               | 144.7 |
| $(\text{P}=\text{C}(\text{CH}_3)_2)^- \rightarrow \text{H}_2 + {}^3 \left( \begin{array}{l} \text{H}_3\text{C} \\ \diagdown \\ \text{P}=\text{CH} \\ \diagup \\ \text{C} \end{array} \right)^-$                          | 139.1 |
| $(\text{P}=\text{C}(\text{CH}_3)_2)^- \rightarrow \text{H}_2 + (\text{CHCHPHCH})^-$                                                                                                                                      | 110.7 |
| $(\text{P}=\text{C}(\text{CH}_3)_2)^- \rightarrow \text{H}_2 + {}^3 \left( \begin{array}{l} \text{HC} \\ \diagdown \\ \text{PH}=\text{CH} \\ \diagup \\ \text{HC} \end{array} \right)^-$                                 | 151.4 |
| $(\text{P}=\text{C}(\text{CH}_3)_2)^- \rightarrow \text{H}_2 + \left( \begin{array}{c} \text{CH}_2 \\ \diagup \quad \diagdown \\ \text{HC} \quad \text{PH} \\ \diagdown \quad \diagup \\ \text{C} \end{array} \right)^-$ | 65.0  |

|                                                                                                                                                                                                                     |       |
|---------------------------------------------------------------------------------------------------------------------------------------------------------------------------------------------------------------------|-------|
| $(\text{P}=\text{C}(\text{CH}_3)_2)^- \rightarrow \text{H}_2 +$                                                                                                                                                     |       |
| $(\text{P}=\text{C}(\text{CH}_3)_2)^- \rightarrow \text{H}_2 + {}^3(\text{CCHCH}_2\text{PH})^-$                                                                                                                     | 104.9 |
| $(\text{P}=\text{C}(\text{CH}_3)_2)^- \rightarrow 2\text{H}_2 + (\text{CH}_2\text{CCP})^-$                                                                                                                          | 66.2  |
| $(\text{P}=\text{C}(\text{CH}_3)_2)^- \rightarrow 2\text{H}_2 + {}^3(\text{CH}_2\text{CCP})^-$                                                                                                                      | 82.7  |
| $(\text{P}=\text{C}(\text{CH}_3)_2)^- \rightarrow 2\text{H}_2 + (\text{CHCCHP})^-$                                                                                                                                  | 79.7  |
| $(\text{P}=\text{C}(\text{CH}_3)_2)^- \rightarrow 2\text{H}_2 + {}^3(\text{CHCCHP})^-$                                                                                                                              | 94.0  |
| $(\text{P}=\text{C}(\text{CH}_3)_2)^- \rightarrow 2\text{H}_2 + (\text{CHCHCP})^-$                                                                                                                                  | 83.5  |
| $(\text{P}=\text{C}(\text{CH}_3)_2)^- \rightarrow 2\text{H}_2 + {}^3(\text{CHCHCP})^-$                                                                                                                              | 133.8 |
| $(\text{P}=\text{C}(\text{CH}_3)_2)^- \rightarrow 2\text{H}_2 + (\text{CHCCPH})^-$                                                                                                                                  | 92.7  |
| $(\text{P}=\text{C}(\text{CH}_3)_2)^- \rightarrow 2\text{H}_2 + {}^3(\text{CHCCPH})^-$                                                                                                                              | 112.3 |
| $(\text{P}=\text{C}(\text{CH}_3)_2)^- \rightarrow 2\text{H}_2 + (\text{CCCHPH})^-$                                                                                                                                  | 83.5  |
| $(\text{P}=\text{C}(\text{CH}_3)_2)^- \rightarrow 2\text{H}_2 + {}^3(\text{CCCHPH})^-$                                                                                                                              | 124.8 |
| $(\text{P}=\text{C}(\text{CH}_3)_2)^- \rightarrow 2\text{H}_2 + (\text{CH}_2\text{CPC})^-$                                                                                                                          | 130.2 |
| $(\text{P}=\text{C}(\text{CH}_3)_2)^- \rightarrow 2\text{H}_2 + {}^3(\text{CH}_2\text{CPC})^-$                                                                                                                      | 146.7 |
| $(\text{P}=\text{C}(\text{CH}_3)_2)^- \rightarrow 2\text{H}_2 + (\text{CHCPHC})^-$                                                                                                                                  | 157.1 |
| $(\text{P}=\text{C}(\text{CH}_3)_2)^- \rightarrow 2\text{H}_2 + {}^3(\text{CHCPHC})^-$                                                                                                                              | 157.8 |
| $(\text{P}=\text{C}(\text{CH}_3)_2)^- \rightarrow 2\text{H}_2 + {}^3(\text{CHCHPC})^-$                                                                                                                              | 161.1 |
| $(\text{P}=\text{C}(\text{CH}_3)_2)^- \rightarrow 2\text{H}_2 + (\text{CCHPHC})^-$                                                                                                                                  | 193.7 |
| $(\text{P}=\text{C}(\text{CH}_3)_2)^- \rightarrow 2\text{H}_2 + {}^3(\text{CCHPHC})^-$                                                                                                                              | 194.4 |
| $(\text{P}=\text{C}(\text{CH}_3)_2)^- \rightarrow 2\text{H}_2 + (\text{CHCPCH})^-$                                                                                                                                  | 101.7 |
| $(\text{P}=\text{C}(\text{CH}_3)_2)^- \rightarrow 2\text{H}_2 + {}^3(\text{CHCPCH})^-$                                                                                                                              | 130.0 |
| $(\text{P}=\text{C}(\text{CH}_3)_2)^- \rightarrow 2\text{H}_2 + (\text{CCPHCH})^-$                                                                                                                                  | 132.2 |
| $(\text{P}=\text{C}(\text{CH}_3)_2)^- \rightarrow 2\text{H}_2 + {}^3(\text{CCPH}_2\text{C})^-$                                                                                                                      | 182.3 |
| $(\text{P}=\text{C}(\text{CH}_3)_2)^- \rightarrow 2\text{H}_2 + (\text{CCCPH}_2)^-$                                                                                                                                 | 132.5 |
| $(\text{P}=\text{C}(\text{CH}_3)_2)^- \rightarrow 2\text{H}_2 + {}^3(\text{CCCPH}_2)^-$                                                                                                                             | 133.6 |
| $(\text{P}=\text{C}(\text{CH}_3)_2)^- \rightarrow 2\text{H}_2 + (\text{CCHCPH})^-$                                                                                                                                  | 94.7  |
| $(\text{P}=\text{C}(\text{CH}_3)_2)^- \rightarrow 2\text{H}_2 + \left( \begin{array}{c} \text{HC} \\ \diagdown \quad \diagup \\ \text{C} - \text{PH} \\ \diagup \quad \diagdown \\ \text{C} \end{array} \right)^-$  | 144.7 |
| $(\text{P}=\text{C}(\text{CH}_3)_2)^- \rightarrow 2\text{H}_2 + \left( \begin{array}{c} \text{C} \\ \diagdown \quad \diagup \\ \text{C} - \text{PH}_2 \\ \diagup \quad \diagdown \\ \text{C} \end{array} \right)^-$ | 125.3 |
| $(\text{P}=\text{C}(\text{CH}_3)_2)^- \rightarrow 2\text{H}_2 + \left( \begin{array}{c} \text{C} \\ \diagdown \quad \diagup \\ \text{C} - \text{PH}_2 \\ \diagup \quad \diagdown \\ \text{C} \end{array} \right)^-$ | 185.9 |

|                                                                                                                                                                                                                                               |       |
|-----------------------------------------------------------------------------------------------------------------------------------------------------------------------------------------------------------------------------------------------|-------|
| $(\text{P}=\text{C}(\text{CH}_3)_2)^- \rightarrow 2\text{H}_2 + \left( \begin{array}{c} \text{CH} \\ \diagup \quad \diagdown \\ \text{HC} \quad \text{P} \\ \diagdown \quad \diagup \\ \text{C} \end{array} \right)^-$                        | 128.4 |
| $(\text{P}=\text{C}(\text{CH}_3)_2)^- \rightarrow 2\text{H}_2 + {}^3 \left( \begin{array}{c} \text{CH} \\ \diagup \quad \diagdown \\ \text{HC} \quad \text{P} \\ \diagdown \quad \diagup \\ \text{C} \end{array} \right)^-$                   | 122.5 |
| $(\text{P}=\text{C}(\text{CH}_3)_2)^- \rightarrow 2\text{H}_2 + \left( \begin{array}{c} \text{P} \\ \diagup \quad \diagdown \\ \text{HC} \quad \text{CH} \\ \diagdown \quad \diagup \\ \text{C} \end{array} \right)^-$                        | 110.3 |
| $(\text{P}=\text{C}(\text{CH}_3)_2)^- \rightarrow 2\text{H}_2 + \left( \begin{array}{c} \text{HC} \\ \diagup \quad \diagdown \\ \text{C} \quad \text{P} \\ \diagdown \quad \diagup \\ \text{HC} \end{array} \right)^-$                        | 170.3 |
| $(\text{P}=\text{C}(\text{CH}_3)_2)^- \rightarrow 2\text{H}_2 + \left( \begin{array}{c} \text{C} \\ \diagup \quad \diagdown \\ \text{C} \quad \text{PH} \\ \diagdown \quad \diagup \\ \text{CH} \end{array} \right)^-$                        | 115.1 |
| $(\text{P}=\text{C}(\text{CH}_3)_2)^- \rightarrow 2\text{H}_2 + {}^3 \left( \begin{array}{c} \text{C} \\ \diagup \quad \diagdown \\ \text{HC} \quad \text{PH} \\ \diagdown \quad \diagup \\ \text{C} \end{array} \right)^-$                   | 184.0 |
| $(\text{P}=\text{C}(\text{CH}_3)_2)^- \rightarrow 2\text{H}_2 + (\text{CH}_2\text{PCC})^-$                                                                                                                                                    | 81.6  |
| $(\text{P}=\text{C}(\text{CH}_3)_2)^- \rightarrow 2\text{H}_2 + \left( \begin{array}{c} \text{H}_2\text{C} \\ \diagup \quad \diagdown \\ \text{C} \quad \text{P} \quad \text{C} \\ \diagdown \quad \diagup \\ \text{C} \end{array} \right)^-$ | 228.8 |
| $(\text{P}=\text{C}(\text{CH}_3)_2)^- \rightarrow 3\text{H}_2 + \left( \begin{array}{c} \text{P} \\ \diagup \quad \diagdown \\ \text{C} \\ \diagdown \quad \diagup \\ \text{C} \quad \text{C} \end{array} \right)^-$                          | 166.1 |
| $(\text{P}=\text{C}(\text{CH}_3)_2)^- \rightarrow 3\text{H}_2 + (\text{CCCP})^-$                                                                                                                                                              | 91.4  |
| $(\text{P}=\text{C}(\text{CH}_3)_2)^- \rightarrow 3\text{H}_2 + {}^3(\text{CCCP})^-$                                                                                                                                                          | 154.9 |
| $(\text{P}=\text{C}(\text{CH}_3)_2)^- \rightarrow 3\text{H}_2 + \left( \begin{array}{c} \text{C} \\ \diagup \quad \diagdown \\ \text{C} \\ \diagdown \quad \diagup \\ \text{C} \quad \text{P} \end{array} \right)^-$                          | 150.8 |
| $(\text{P}=\text{C}(\text{CH}_3)_2)^- \rightarrow 3\text{H}_2 + {}^3(\text{CCPC})^-$                                                                                                                                                          | 203.2 |
| $(\text{P}=\text{C}(\text{CH}_3)_2)^- \rightarrow \text{CH}_3\text{CH}_3 + (\text{CP})^-$                                                                                                                                                     | 17.5  |
| $(\text{P}=\text{C}(\text{CH}_3)_2)^- \rightarrow \text{CH}_3\text{CH}_3 + {}^3(\text{CP})^-$                                                                                                                                                 | 111.2 |
| $(\text{P}=\text{C}(\text{CH}_3)_2)^- \rightarrow (\text{CH}_3\text{CH}_2)^- + \text{CHP}$                                                                                                                                                    | 72.6  |
| $(\text{P}=\text{C}(\text{CH}_3)_2)^- \rightarrow (\text{CH}_3\text{CH}_2)^- + {}^3\text{CHP}$                                                                                                                                                | 154.1 |
| $(\text{P}=\text{C}(\text{CH}_3)_2)^- \rightarrow \text{CH}_2\text{CH}_2 + (\text{CH}_2\text{P})^-$                                                                                                                                           | 36.0  |
| $(\text{P}=\text{C}(\text{CH}_3)_2)^- \rightarrow \text{CH}_2\text{CH}_2 + (\text{CH}_2\text{P})^-$                                                                                                                                           | 58.0  |
| $(\text{P}=\text{C}(\text{CH}_3)_2)^- \rightarrow \text{CH}_2\text{CH}_2 + (\text{CHPH})^-$                                                                                                                                                   | 59.3  |
| $(\text{P}=\text{C}(\text{CH}_3)_2)^- \rightarrow \text{CH}_2\text{CH}_2 + {}^3(\text{CHPH})^-$                                                                                                                                               | 85.6  |
| $(\text{P}=\text{C}(\text{CH}_3)_2)^- \rightarrow (\text{CH}_2\text{CH})^- + \text{CH}_3\text{P}$                                                                                                                                             | 122.6 |



|                                                                                                        |       |
|--------------------------------------------------------------------------------------------------------|-------|
| $(\text{P}=\text{C}(\text{CH}_3)_2)^- \rightarrow (\text{CH}_2\text{CH})^- + {}^3\text{CH}_3\text{P}$  | 88.0  |
| $(\text{P}=\text{C}(\text{CH}_3)_2)^- \rightarrow (\text{CH}_2\text{CH})^- + \text{CH}_2\text{PH}$     | 77.2  |
| $(\text{P}=\text{C}(\text{CH}_3)_2)^- \rightarrow (\text{CH}_2\text{CH})^- + {}^3\text{CH}_2\text{PH}$ | 156.4 |
| $(\text{P}=\text{C}(\text{CH}_3)_2)^- \rightarrow (\text{CH}_2\text{CH})^- + \text{CHPH}_2$            | 137.3 |
| $(\text{P}=\text{C}(\text{CH}_3)_2)^- \rightarrow (\text{CH}_2\text{CH})^- + {}^3\text{CHPH}_2$        | 145.0 |
| $(\text{P}=\text{C}(\text{CH}_3)_2)^- \rightarrow 2{}^2\text{C}^- + {}^2\text{P} + 3\text{H}_2$        | 670.6 |
| $(\text{P}=\text{C}(\text{CH}_3)_2)^- \rightarrow 2{}^2\text{C}^- + {}^4\text{P} + 3\text{H}_2$        | 619.3 |
| $(\text{P}=\text{C}(\text{CH}_3)_2)^- \rightarrow 2\text{C} + \text{P}^- + 3\text{H}_2$                | 736.7 |
| $(\text{P}=\text{C}(\text{CH}_3)_2)^- \rightarrow 2\text{C} + {}^3\text{P}^- + 3\text{H}_2$            | 703.8 |
| $(\text{P}=\text{C}(\text{CH}_3)_2)^- \rightarrow 2{}^3\text{C} + \text{P}^- + 3\text{H}_2$            | 594.1 |
| $(\text{P}=\text{C}(\text{CH}_3)_2)^- \rightarrow 2{}^3\text{C} + {}^3\text{P}^- + 3\text{H}_2$        | 561.3 |

**Table S4.** Reaction energies ( $E_r$  in kcal/mol) of the  $(\text{P}=\text{C}(\text{C}_6\text{H}_5)_2)^-$ ,  $(\text{P}=\text{CF}-\text{C}_6\text{F}_4-\text{C}_6\text{F}_5)^-$  and  $(\text{P}=\text{CMes}_2)^-$  fragmentation processes.

| Decomposition path                                                                                                                                                                               | $E_r$ [kcal/mol] |
|--------------------------------------------------------------------------------------------------------------------------------------------------------------------------------------------------|------------------|
| $(\text{P}=\text{C}(\text{C}_6\text{H}_5)_2)^- \rightarrow$ 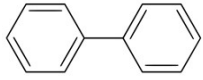 $+ (\text{C}\equiv\text{P})^-$                     | 35.2             |
| $(\text{P}=\text{C}(\text{C}_6\text{H}_5)_2)^- \rightarrow$  $+ 3(\text{C}\equiv\text{P})^-$                    | 128.9            |
| $(\text{P}=\text{CF}-\text{C}_6\text{F}_4-\text{C}_6\text{F}_5)^- \rightarrow$  $+ (\text{C}\equiv\text{P})^-$  | 57.4             |
| $(\text{P}=\text{CF}-\text{C}_6\text{F}_4-\text{C}_6\text{F}_5)^- \rightarrow$  $+ 3(\text{C}\equiv\text{P})^-$ | 151.1            |
| $(\text{P}=\text{CMes}_2)^- \rightarrow$  $+ (\text{C}\equiv\text{P})^-$                                       | 30.6             |
| $(\text{P}=\text{CMes}_2)^- \rightarrow$  $+ 3(\text{C}\equiv\text{P})^-$                                     | 124.3            |
